# Supplementary material for: Establishment of a Rhesus Macaque Model for Scrub Typhus Transmission: Pilot Study to Evaluate the Minimal Orientia tsutsugamushi Transmission Time by Leptotrombidium chiangraiensis Chiggers
Source: MDPI journal article supplement (doi:10.3390/pathogens10081028), 2021-08-13
Supplement: s1 [file s1]

## Supplement table and figure

**Table S1. Complete blood count of rhesus macaques**

### Comparison CBC results at differential day after feeding for control group

| Tests | Units               | Day after feeding for control group |         |         |         |         |         |         |
|-------|---------------------|-------------------------------------|---------|---------|---------|---------|---------|---------|
|       |                     | -21 day                             | -14 day | 0 day   | 7 day   | 14 day  | 21 day  | 28 day  |
| RBC   | 10 <sup>6</sup> /ul | 4.79                                | 4.76    | 4.83    | 5.01    | 4.93    | 5.12    | 5.02    |
| Hct   | %                   | 38                                  | 38      | 39      | 40      | 39      | 41      | 40      |
| Hb    | gm%                 | 12.0                                | 12.2    | 12.2    | 12.7    | 12.3    | 12.7    | 12.5    |
| WBC   | cells/ul            | 3,700                               | 4,500   | 4,200   | 7,500   | 4,100   | 4,700   | 3,300   |
| Plt   | cells/ul            | 154,000                             | 235,000 | 233,000 | 173,000 | 265,000 | 206,000 | 251,000 |
| MCV   | fl                  | 79.7                                | 79.4    | 79.7    | 79.0    | 79.9    | 79.9    | 80.1    |
| MCH   | pg                  | 25.1                                | 25.6    | 25.3    | 25.3    | 24.9    | 24.8    | 24.9    |
| MCHC  | g/dl                | 31.4                                | 32.3    | 31.7    | 32.1    | 31.2    | 31.1    | 31.1    |
| Neu-s | %                   | 35                                  | 63      | 58      | 51      | 57      | 49      | 41      |
| N-b   | %                   | 0                                   | 2       | 2       | 2       | 2       | 3       | 3       |
| Lymp  | %                   | 56                                  | 28      | 35      | 38      | 37      | 42      | 46      |
| Bas   | %                   | 1                                   | 0       | 1       | 1       | 0       | 1       | 1       |
| Eos   | %                   | 1                                   | 0       | 1       | 1       | 0       | 1       | 1       |
| Mon   | %                   | 4                                   | 3       | 2       | 3       | 1       | 1       | 2       |

### Comparison CBC results at differential day after feeding for NHP-1

| Tests | Units               | Day after feeding for NHP-1 |         |         |         |         |         |         |
|-------|---------------------|-----------------------------|---------|---------|---------|---------|---------|---------|
|       |                     | -21 day                     | -14 day | 0 day   | 7 day   | 14 day  | 21 day  | 28 day  |
| RBC   | 10 <sup>6</sup> /ul | 6.38                        | 5.99    | 6.26    | 6.16    | 6.12    | 6.06    | 6.18    |
| Hct   | %                   | 44                          | 41      | 43      | 42      | 42      | 41      | 42      |
| Hb    | gm%                 | 14.5                        | 14.0    | 14.7    | 14.2    | 14.1    | 13.8    | 14.2    |
| WBC   | cells/ul            | 5,400                       | 6,800   | 7,900   | 6,700   | 6,600   | 8,800   | 7,900   |
| Plt   | cells/ul            | 303,000                     | 266,000 | 359,000 | 341,000 | 339,000 | 340,000 | 376,000 |
| MCV   | fl                  | 69.1                        | 68.6    | 68.1    | 68.8    | 68.3    | 68.2    | 68.1    |
| MCH   | pg                  | 22.7                        | 23.4    | 23.5    | 23.1    | 23.0▼   | 22.8▼   | 23.0▼   |
| MCHC  | g/dl                | 32.9                        | 34.1    | 34.5    | 33.5    | 33.7▼   | 33.4▼   | 33.7    |
| Neu-s | %                   | 42                          | 57      | 65      | 46      | 53      | 49▼     | 50▼     |
| N-b   | %                   | 1                           | 2       | 2       | 1       | 2       | 0       | 1       |
| Lymp  | %                   | 49                          | 37      | 31      | 47      | 38      | 46▲     | 45▲     |
| Bas   | %                   | 1                           | 0       | 1       | 0       | 3       | 1       | 1       |
| Eos   | %                   | 1                           | 0       | 1       | 0       | 3       | 1       | 1       |
| Mon   | %                   | 6                           | 3       | 1       | 3       | 1▼      | 2       | 2       |

**Comparison CBC results at differential day after feeding for NHP-3**

| Tests | Units               | Day after feeding for NHP-3 |         |         |         |         |         |         |
|-------|---------------------|-----------------------------|---------|---------|---------|---------|---------|---------|
|       |                     | -21 day                     | -14 day | 0 day   | 7 day   | 14 day  | 21 day  | 28 day  |
| RBC   | 10 <sup>6</sup> /ul | 5.35                        | 5.33    | 5.43    | 5.58    | 5.44    | 5.09    | 5.43    |
| Hct   | %                   | 40                          | 40      | 41      | 42      | 41      | 39      | 41      |
| Hb    | gm%                 | 13.0                        | 13.4    | 13.2    | 13.4    | 13.0    | 12.3    | 13.0    |
| WBC   | cells/ul            | 4,900                       | 7,000   | 4,300   | 5,300   | 6,600   | 8,100   | 7,300   |
| Plt   | cells/ul            | 263,000                     | 269,000 | 333,000 | 427,000 | 279,000 | 391,000 | 320,000 |
| MCV   | fl                  | 75.0                        | 75.2    | 75.3    | 76.0    | 76.1    | 76.2    | 74.3    |
| MCH   | pg                  | 24.3                        | 25.1    | 24.3    | 24.0    | 23.9▼   | 24.2▼   | 24.4▼   |
| MCHC  | g/dl                | 32.4                        | 33.4    | 32.3    | 31.6    | 31.4▼   | 31.7▼   | 32.8    |
| Neu-s | %                   | 38                          | 46      | 48      | 48      | 61      | 33▼     | 34▼     |
| N-b   | %                   | 4                           | 1       | 2       | 2       | 5       | 2       | 0       |
| Lymp  | %                   | 53                          | 46      | 41      | 46      | 28      | 58▲     | 60▲     |
| Bas   | %                   | 0                           | 0       | 0       | 0       | 0       | 0       | 0       |
| Eos   | %                   | 0                           | 0       | 0       | 0       | 0       | 0       | 0       |
| Mon   | %                   | 2                           | 3       | 1       | 4       | 0▼      | 3       | 3       |

‘▲’ means that the- values showed significantly increased after chigger challenge. ‘▼’ means that the values showed significantly decreased after chigger challenge.

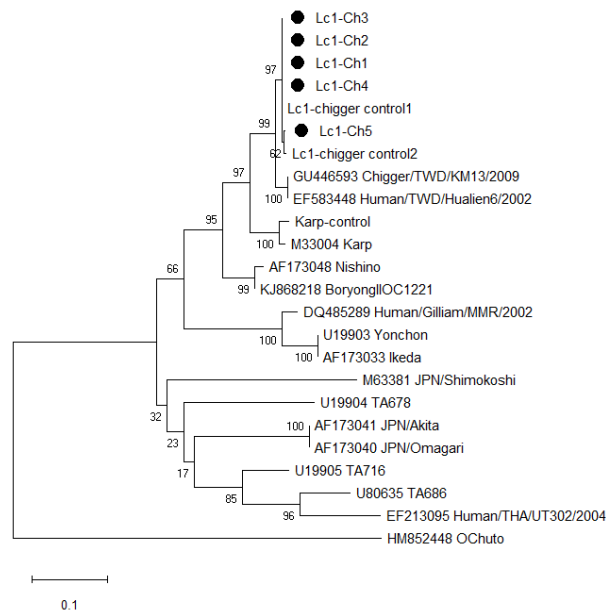

Figure S1. Phylogenetic analysis of *O. tsutsugamushi* in *Leptotrombidium chaingraiensis* chiggers from the colonies. The evolutionary tree was inferred by using Maximum likelihood method and General Time Reversible model. A discrete Gamma distribution was used to model evolutionary rate differences among sites. The tree is drawn to scale, with branch lengths measured in the number of substitutions per site. Numbers at nodes indicate bootstrap value at 1000 replications.

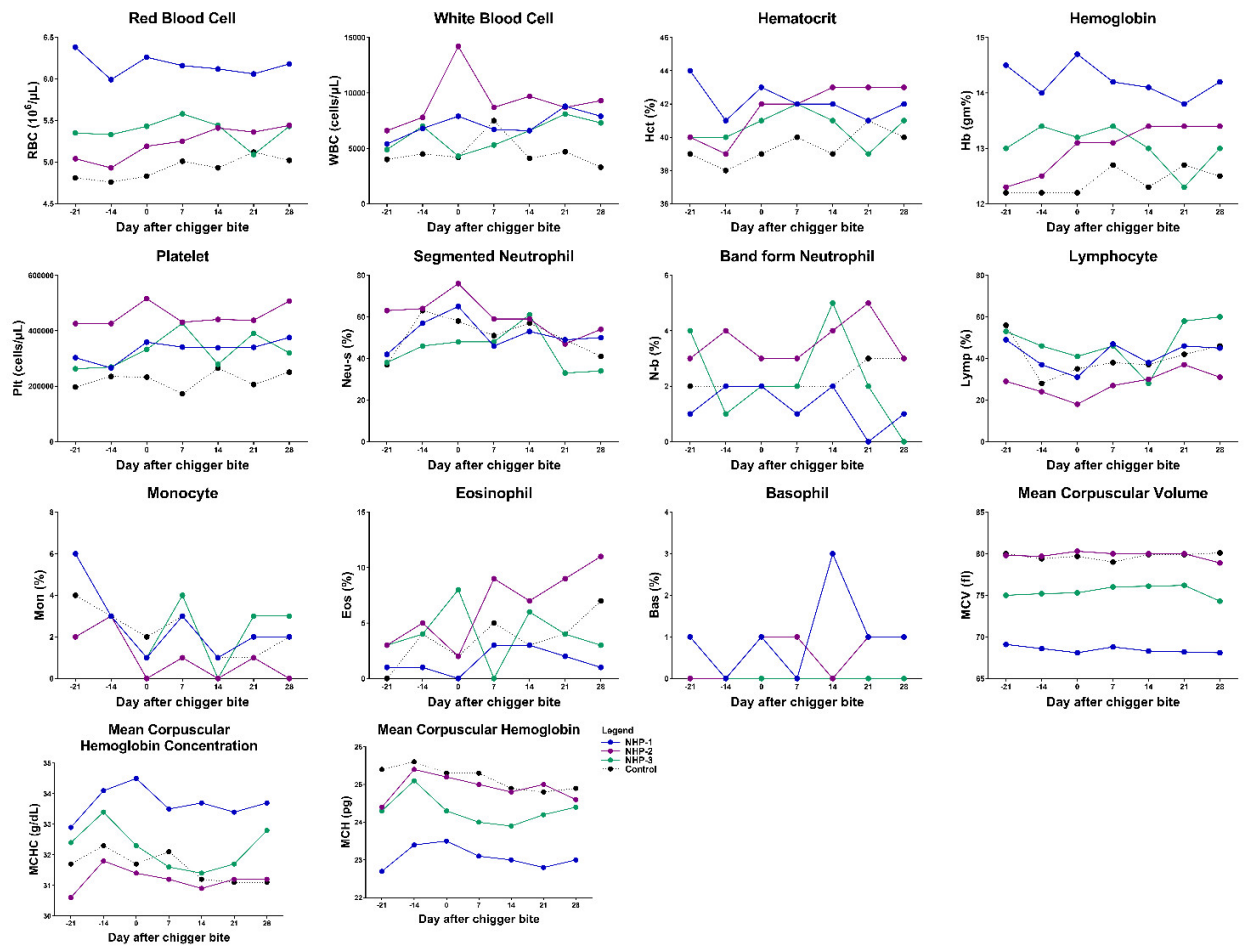

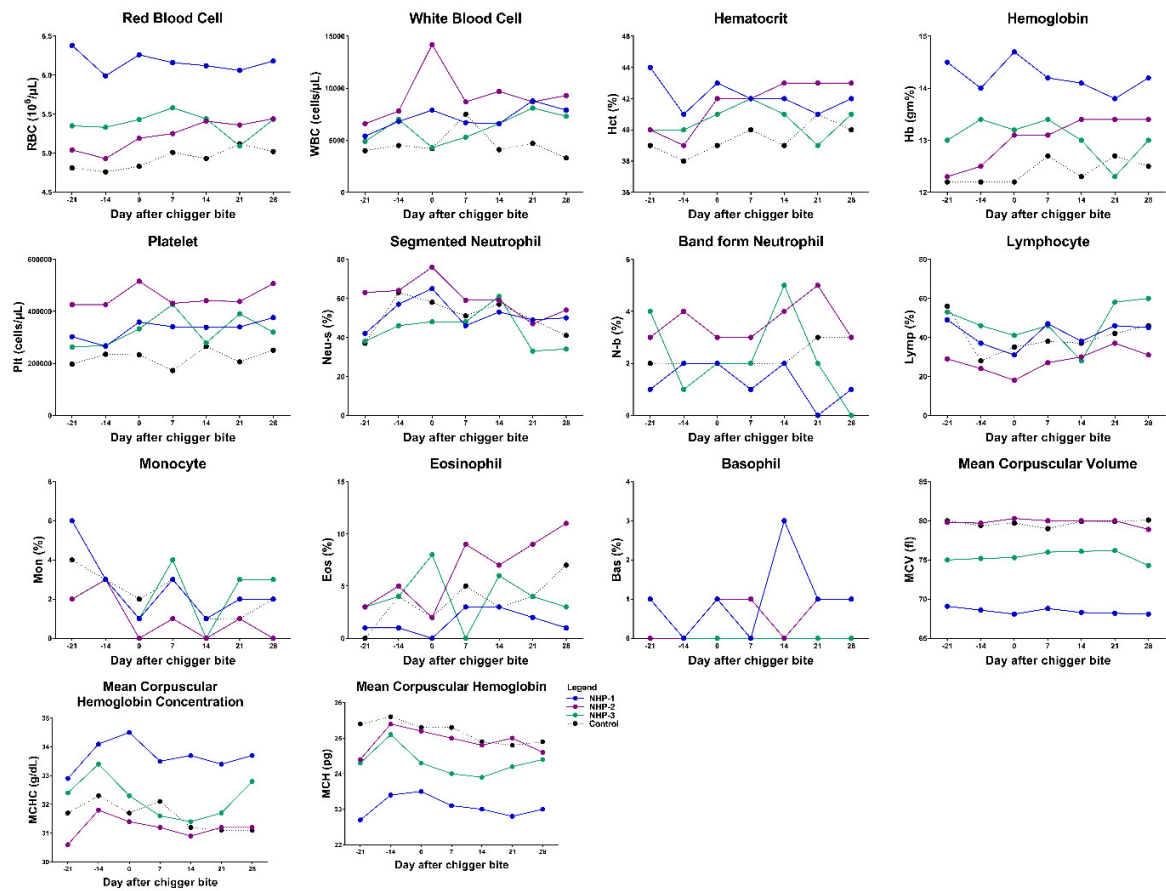

Figure S2. Hematological analysis of rhesus macaques after *O. tsutsugamushi* infection or non-infected chigger bite (control).

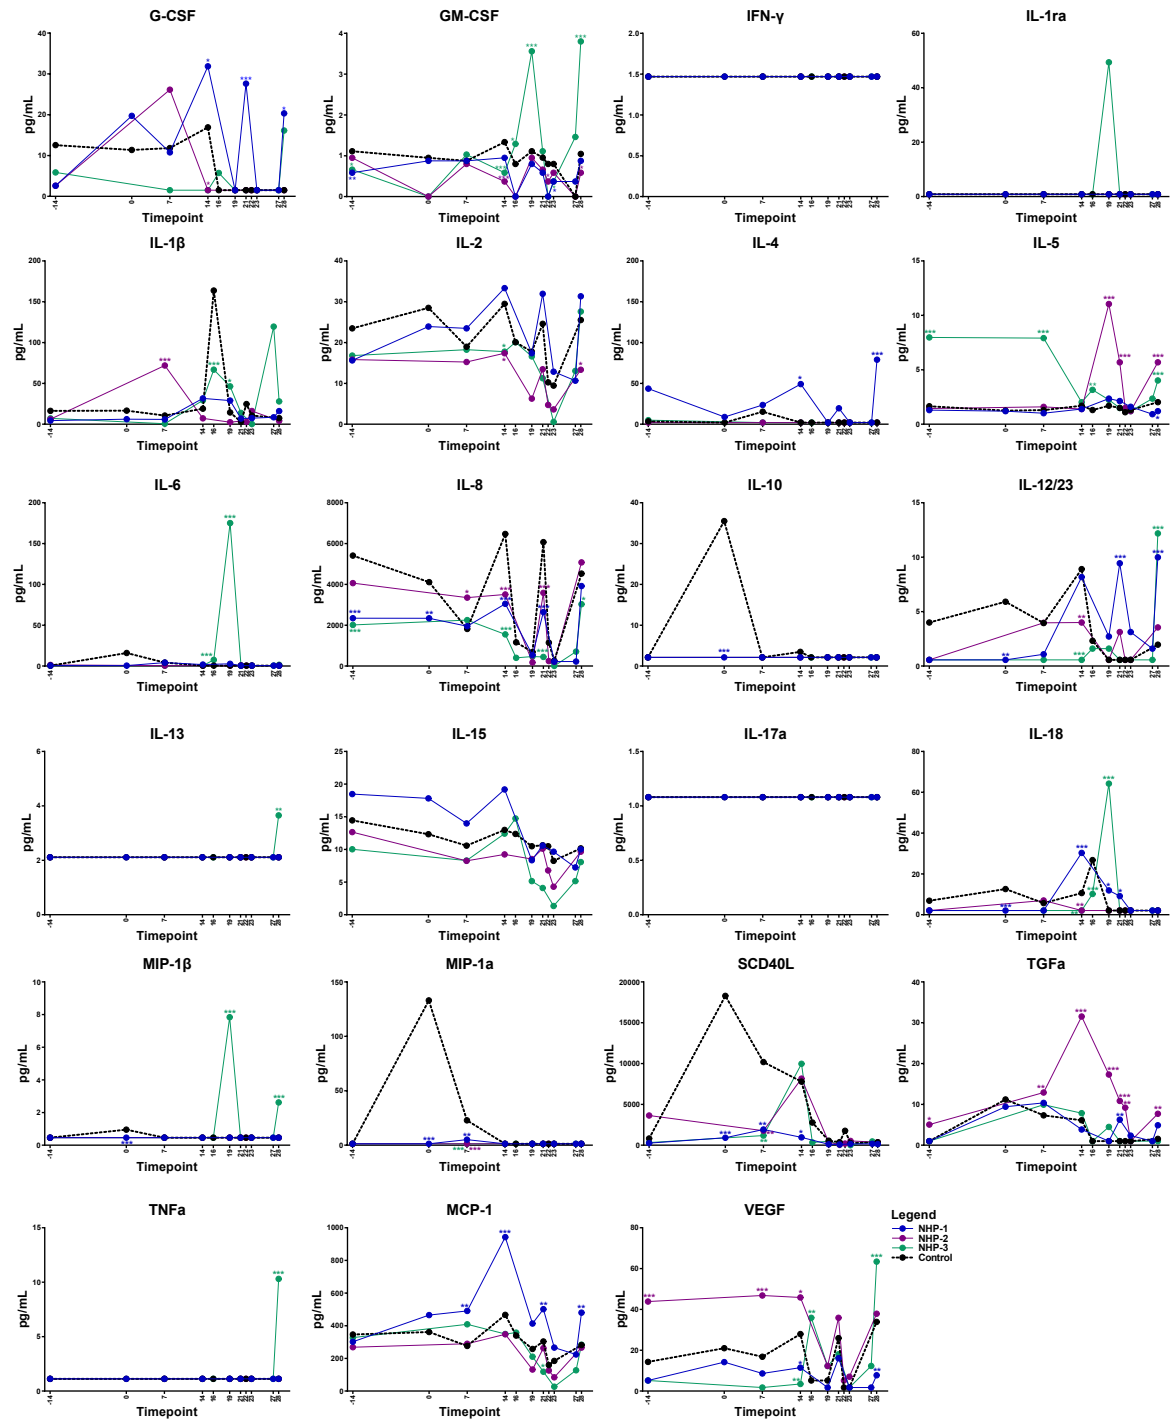

Figure S3. Serum levels of 23 cytokine/ chemokine in rhesus macaques during *O. tsutsugamushi* infection via chigger bite.

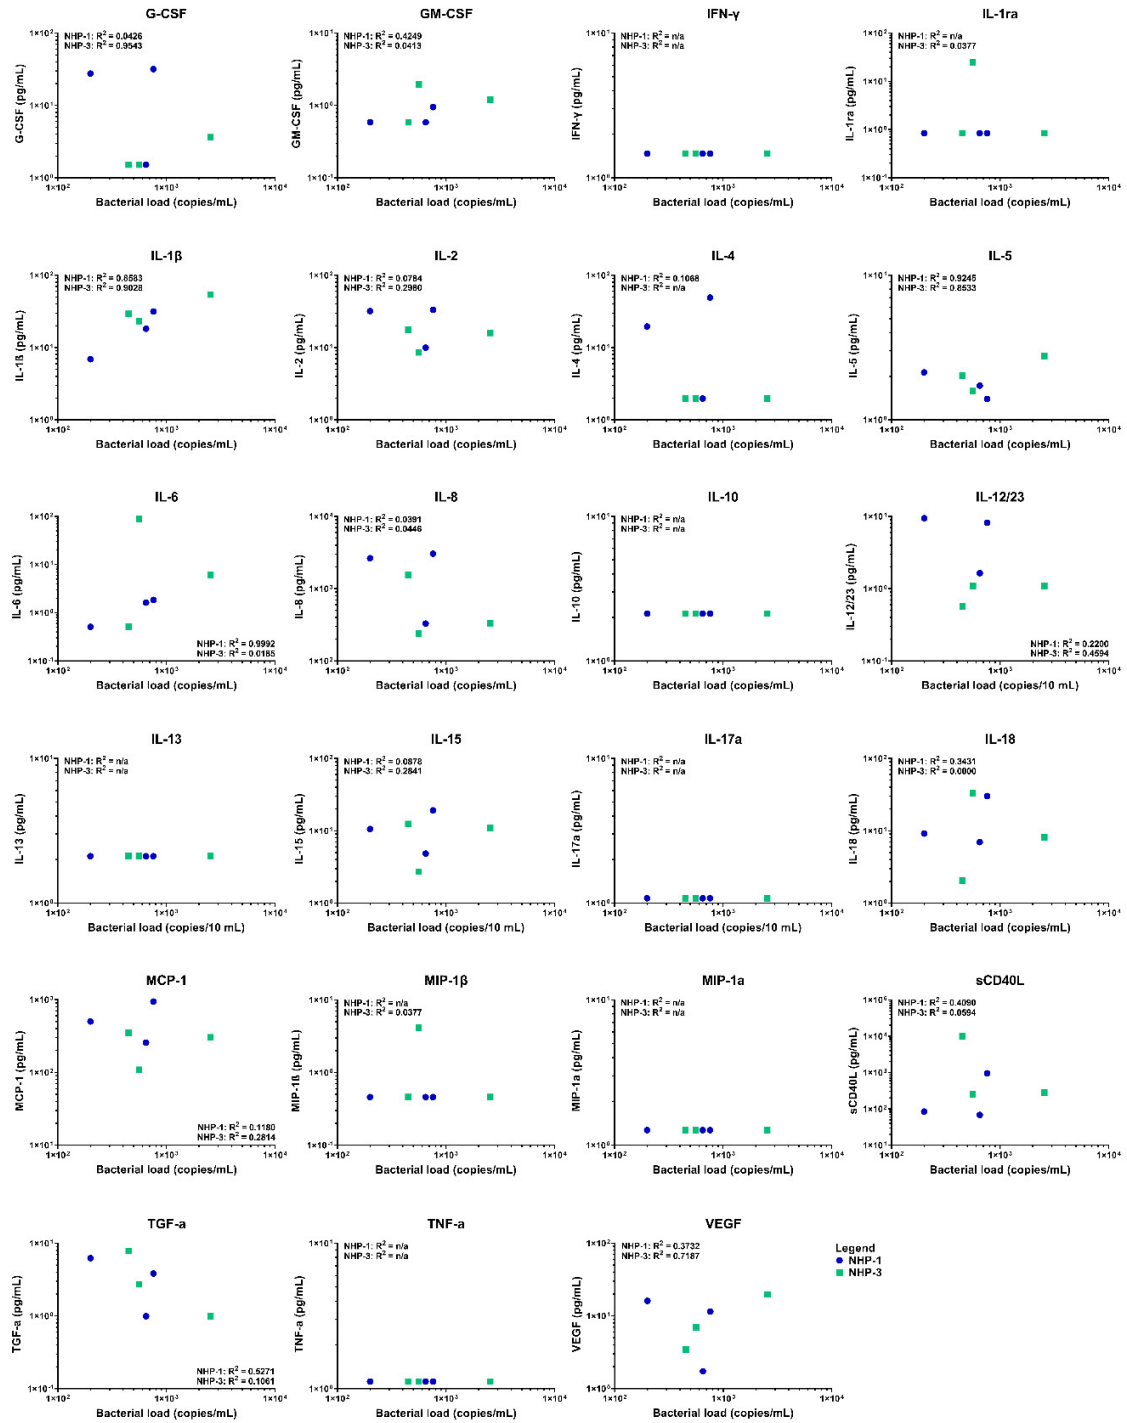

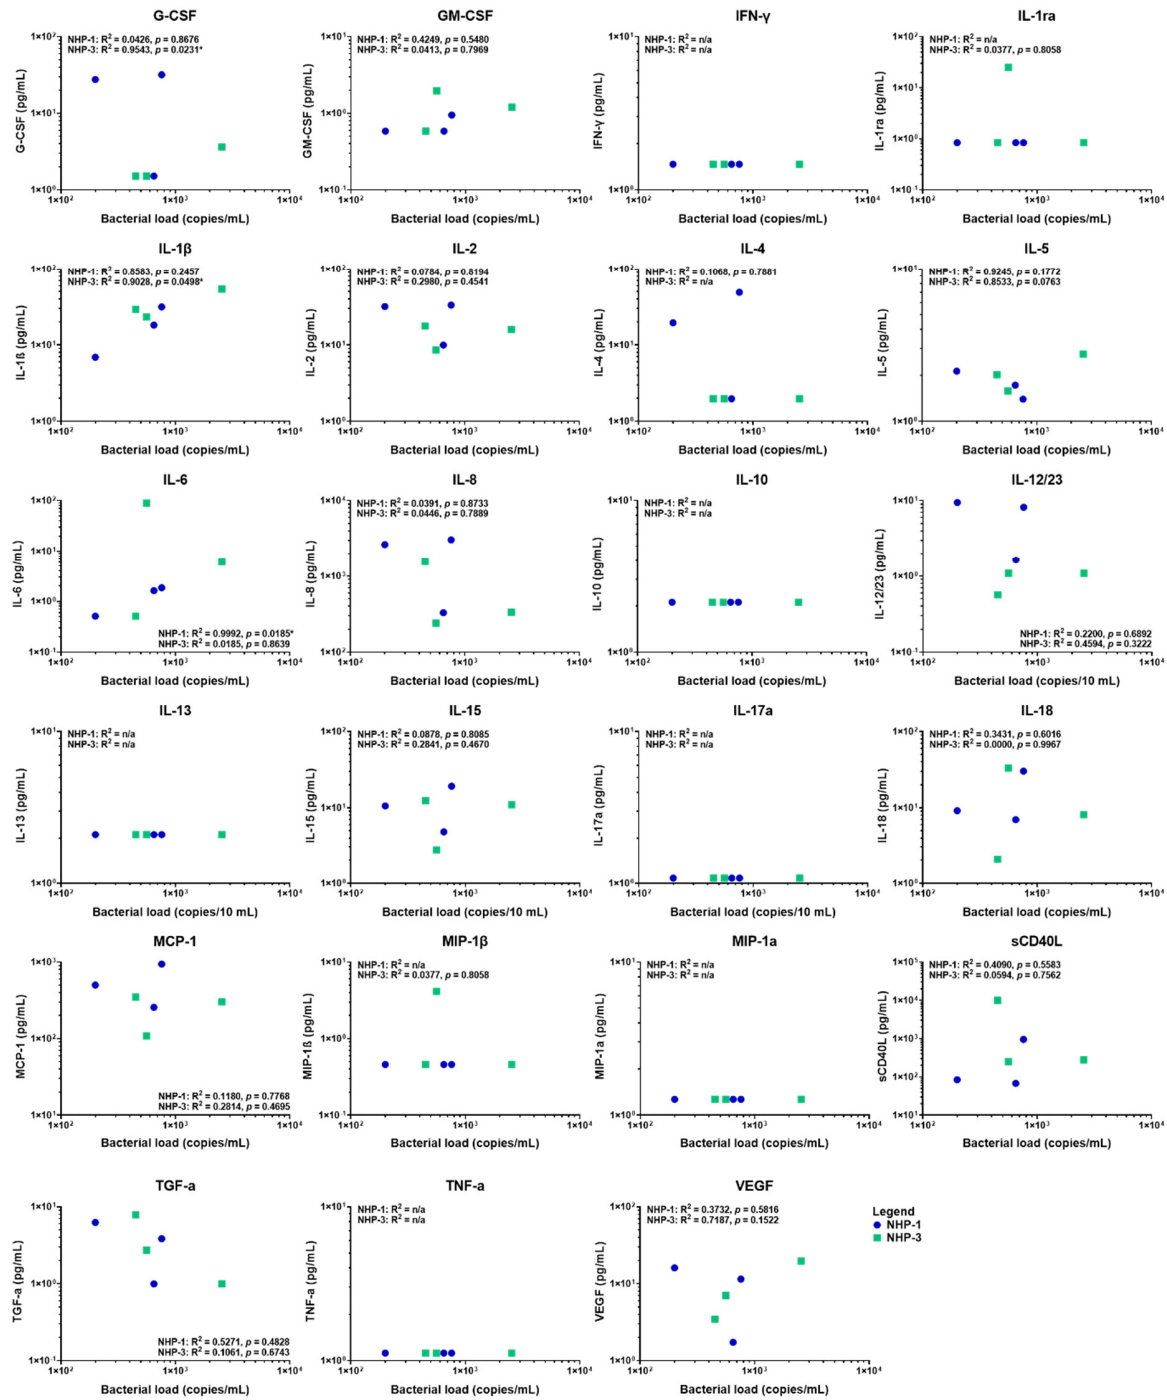

Figure S4. Immunological correlation analysis of serum cytokine/ chemokine of all macaques and bacteremia during acute phase of infection. Correlation efficiency and P value were calculated based on the duplication of each individual samples.
